# Supplementary material for: Climate Cycles, Habitat Stability, and Lineage Diversification in an African Biodiversity Hotspot
Source: MDPI journal article supplement (doi:10.3390/d15030394), 2023-03-09
Supplement: s1 [file s1]

**Table S1.** Summary of the presence/absence of phylogeographic breaks for each of 14 co-distributed forest-dependent bird lineages across the sky islands of East Africa Mountains of Tanzania. STZ Volcanic corresponds to Southern Tanzania Volcanic Highlands.

| Lineage                                  | Usambara-Nguu/Nguru | Nguu/Nguru-Ukaguru | Rubeho-Uluguru | Rubeho-Udzungwa | Udzungwa-STZ Volcanic |
|------------------------------------------|---------------------|--------------------|----------------|-----------------|-----------------------|
| <i>Stactolaema olivacea</i>              | Yes                 |                    |                |                 |                       |
| <i>Artisornis metopias</i>               | Yes                 |                    | Yes            |                 | Yes                   |
| <i>Crithagra striolata</i> complex       | Yes                 |                    |                |                 |                       |
| <i>Modulatrix stictigula</i>             | Yes                 | Yes                | Yes            | Yes             |                       |
| <i>Sheppardia sharpei</i>                | Yes                 | Yes                |                |                 |                       |
| <i>Sheppardia montana</i> complex        | Yes                 |                    |                | Yes             |                       |
| <i>Chamaetylas fuelleborni</i>           | Yes                 |                    |                |                 | Yes                   |
| <i>Pogonocichala stellata</i>            |                     |                    |                |                 |                       |
| <i>Cinnyris mediocris</i> complex        | Yes                 | Yes                | Yes            |                 | Yes*                  |
| <i>Cyanomitra olivacea</i>               |                     |                    |                |                 |                       |
| <i>Batis capensis</i> complex            |                     | Yes                |                |                 |                       |
| <i>Arizelocichla milanjensis</i> complex | Yes                 |                    |                | Yes             | Yes                   |
| <i>Phyllastrephus flavostriatus</i>      |                     | Yes                | Yes            |                 | Yes                   |
| <i>Turdus abyssinicus</i> complex        | Yes                 |                    |                |                 |                       |
| # of lineages with break                 | 10                  | 5                  | 4              | 3               | 4                     |

\*For the Eastern Double-collared sunbird complex, there is a contact zone between two lineages (*C. moreaui* and *C. fuelleborni*) that replace each other in the Udzungwa Mountains [45].
