# Supplementary figures and images for: Climate Cycles, Habitat Stability, and Lineage Diversification in an African Biodiversity Hotspot
Source: MDPI journal article supplement (doi:10.3390/d15030394), 2023-03-09

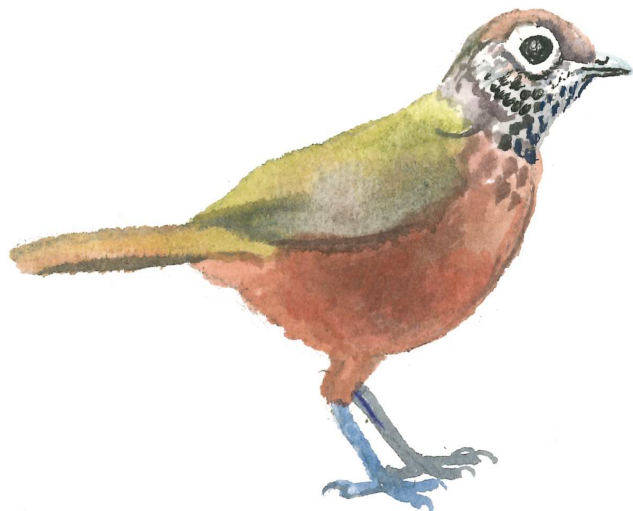

Spot-throat (*Modulatrix stictigula*)

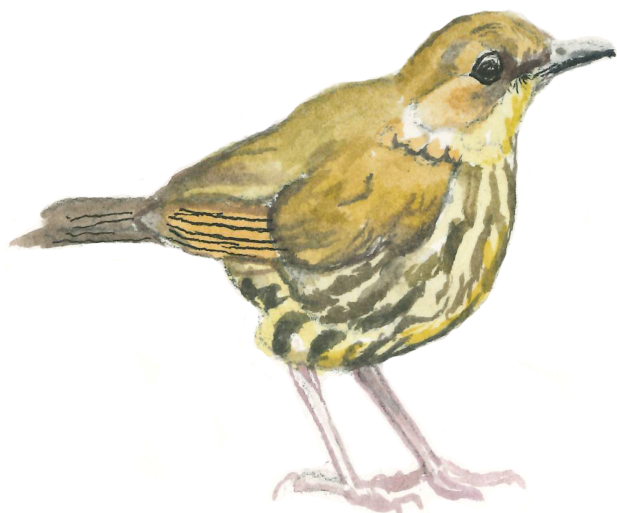

Dapple-throat (*Arcanator orostruthus*)

Arcanator   
100

  
0.09

72

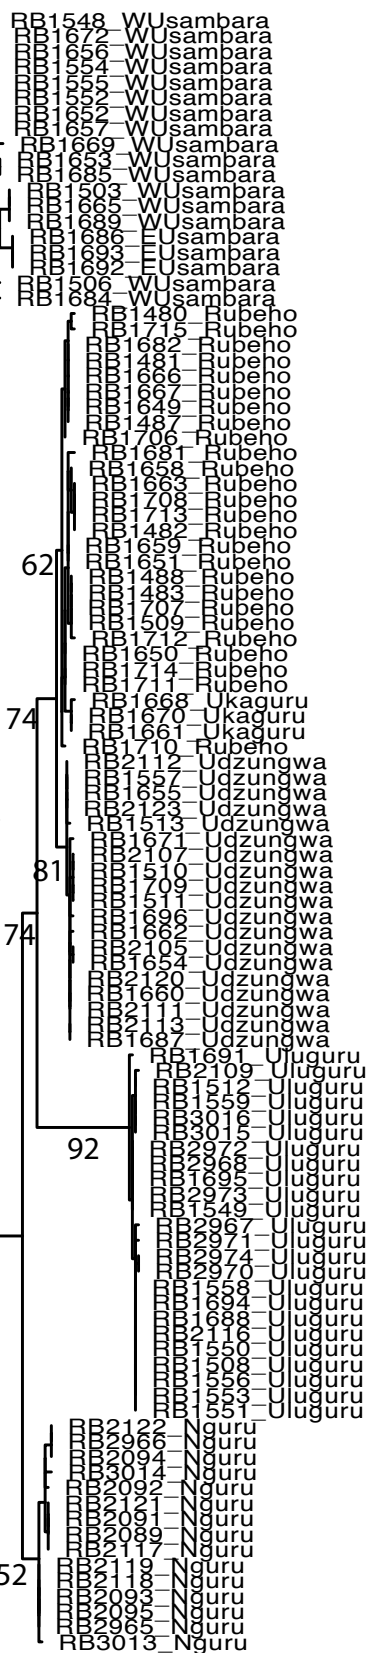

Supplement: s1 [file s1]
